# Supplementary material
Source: PubMed Central journal article supplement (PMC4239626)
Supplement: supp_M114.585901_jbc.M114.585901-1.pdf [file supp_M114.585901_jbc.M114.585901-1.pdf]

## Supplementary Information

### Toll-like receptors as a target of food-derived anti-inflammatory compounds

Takahiro Shibata<sup>1\*</sup>, Fumie Nakashima<sup>1\*</sup>, Kazuya Honda<sup>1\*</sup>, Yu-Jhang Lu<sup>1</sup>, Tatsuhiko Kondo<sup>1</sup>, Yusuke Ushida<sup>2</sup>, Koichi Aizawa<sup>2</sup>, Hiroyuki Suganuma<sup>2</sup>, Sho Oe<sup>3</sup>, Hiroshi Tanaka<sup>3</sup>, Takashi Takahashi<sup>3</sup>, and Koji Uchida<sup>1,†</sup>

<sup>1</sup>Graduate School of Bioagricultural Sciences, Nagoya University, Nagoya 464-8601, Japan. <sup>2</sup>Research & Development Division, Kagome Company, Limited, 17 Nishitomiya, Nasushiobara 329-2762, Japan.

<sup>3</sup>Graduate School of Science and Engineering, Tokyo Institute of Technology, Tokyo 152-8552, Japan

<sup>†</sup>To whom correspondence should be addressed: Koji Uchida, Laboratory of Food and Biodynamics, Graduate School of Bioagricultural Sciences, Nagoya University, Nagoya 464–8601, Japan.  
Tel.: 81-52-789-4127; Fax: 81-52-789-5296; E-mail: [uchidak@agr.nagoya-u.ac.jp](mailto:uchidak@agr.nagoya-u.ac.jp)

\*These authors contributed equally to this work.

#### Supplementary text

##### The spectral data of isothiocyanate derivatives

###### 3-(Methylsulfanyl)propyl isothiocyanate

<sup>1</sup>H NMR (400 MHz, CDCl<sub>3</sub>) δ 3.66 (t, *J* = 6.8 Hz, 2H), 2.62 (t, *J* = 6.8 Hz, 2H), 2.11 (s, 3H), 1.98 (tt, *J*<sub>b,a</sub> = 6.8 Hz, 6.8 Hz, 2H); <sup>13</sup>C NMR (100 MHz, CDCl<sub>3</sub>) δ 130.7, 43.7, 30.9, 29.1, 15.6; IR (KBr) 2917, 2853, 2184, 2103, 1442, 1346 (cm<sup>-1</sup>).

###### 3-(Methylsulfinyl)propyl isothiocyanate

<sup>1</sup>H NMR (400 MHz, CDCl<sub>3</sub>) δ 3.82-3.68 (m, 2H), 2.88-2.75 (m, 2H), 2.64 (s, 3H), 2.27-2.18 (m, 2H, b); IR (KBr) 2918, 2850, 2185, 2103, 1445, 1350, 1046, 1018 (cm<sup>-1</sup>).

###### 3-(Methylsulfonyl)propyl isothiocyanate

<sup>1</sup>H NMR (400 MHz, CDCl<sub>3</sub>) δ 3.79 (t, *J*<sub>a,b</sub> = 6.3 Hz, 2H), 3.17 (t, *J*<sub>c,b</sub> = 7.2 Hz, 2H), 2.98 (s, 3H), 2.27 (tt, *J*<sub>b,a</sub> = 6.3, 7.2 Hz, 2H); IR (KBr) 3017, 2924, 2851, 2189, 2107, 1445, 1412, 1353, 1304, 1131, 963 (cm<sup>-1</sup>).

###### 3-(1-Propylsulfinyl)propyl isothiocyanate

<sup>1</sup>H NMR (400 MHz, CDCl<sub>3</sub>) δ 3.81-3.69 (m, 2H), 2.83-2.60 (m, 4H), 2.26-2.19 (m, 2H), 1.89-1.80 (m, 2H), 1.11 (t, *J* = 7.3 Hz, 3H); IR (KBr) 2965, 2933, 2875, 2185, 2096, 1456, 1349, 1017 (cm<sup>-1</sup>).

###### 3-(2-Propylsulfinyl)propyl isothiocyanate

<sup>1</sup>H NMR (400 MHz, CDCl<sub>3</sub>) δ 3.84-3.66 (m, 2H, a), 2.89-2.64 (m, 3H, c, d), 2.28-2.18 (m, 2H, b), 1.40-1.21 (m, 6H, e); IR (KBr) 2967, 2932, 2183, 2094, 1447, 1349, 1049, 1014 (cm<sup>-1</sup>).

###### 3-(Pentylsulfinyl)propyl isothiocyanate

<sup>1</sup>H NMR (400 MHz, CDCl<sub>3</sub>) δ 3.83-3.66 (m, 2H), 2.85-2.61 (m, 4H), 2.23 (tt, *J* = 6.8, 6.8 Hz, 2H), 1.88-1.68 (m, 2H), 1.55-1.32 (m, 4H), 0.95 (t, *J* = 6.8 Hz, 3H); IR (KBr) 2957, 2931, 2861, 2185, 2098, 1456, 1349, 1042, 1018 (cm<sup>-1</sup>).

###### 4-(Methylsulfinyl)butyl isothiocyanate

<sup>1</sup>H NMR (400 MHz, CDCl<sub>3</sub>) δ 3.61 (t, *J* = 6.3 Hz, 2H), 2.81-2.65 (m, 2H), 2.61 (s, 3H), 2.02-1.81 (m, 4H); IR (KBr) 2920, 2851, 2106, 2182, 1453, 1350, 1061, 1028 (cm<sup>-1</sup>).

###### 5-(Methylsulfinyl)pentyl isothiocyanate

<sup>1</sup>H NMR (400 MHz, CDCl<sub>3</sub>); 3.56 (t, *J* = 6.3 Hz, 2H), 2.80-2.62 (m, 2H), 2.59 (s, 3H), 1.90-1.52 (m, 6H); IR (KBr) 3418, 2941, 2863, 2183, 2107, 1455, 1347, 1021 (cm<sup>-1</sup>).

###### 6-(Methylsulfinyl)hexyl isothiocyanate

<sup>1</sup>H NMR (400 MHz, CDCl<sub>3</sub>) δ 3.53 (t, *J* = 6.3 Hz, 2H), 2.80-2.64 (m, 2H), 2.59 (s, 3H), 1.88-1.44 (m, 8H); IR (KBr) 3433, 2927, 2857, 2182, 2104, 1456, 1348, 1029 (cm<sup>-1</sup>).

###### 7-(Methylsulfinyl)heptyl isothiocyanate

IR (KBr) 3443, 2931, 2858, 2181, 2105, 1456, 1347, 1036 (cm<sup>-1</sup>).

**8-(Methylsulfinyl)octyl isothiocyanate**

$^1\text{H}$  NMR (400 MHz,  $\text{CDCl}_3$ )  $\delta$  3.52 (t,  $J = 6.8$  Hz, 2H), 2.79-2.62 (m, 2H), 2.57 (s, 3H), 1.82-1.31 (m, 12H); IR (KBr) 3431, 2929, 2856, 2179, 2106, 1456, 1347, 1039 ( $\text{cm}^{-1}$ ).

**4-(1-Methylsulfanyl)butyl isothiocyanate**

$^1\text{H}$  NMR (400 MHz,  $\text{CDCl}_3$ )  $\delta$  3.56 (t,  $J = 6.8$  Hz, 2H), 2.54 (t,  $J = 6.8$  Hz, 2H), 2.11 (s, 3H), 1.86-1.68 (m, 4H); IR (KBr) 2945, 2917, 2857, 2184, 2107, 1450, 1347 ( $\text{cm}^{-1}$ ).

**4-(1-Methylsulfonyl)butyl isothiocyanate**

$^1\text{H}$  NMR (400 MHz,  $\text{CDCl}_3$ )  $\delta$  3.62 (t,  $J = 6.3$  Hz, 2H), 3.07 (t,  $J = 7.3$  Hz, 2H), 2.94 (s, 3H), 2.08-1.88 (m, 4H); IR (KBr) 3013, 2929, 2875, 2185, 2111, 1453, 1294, 1130, 966 ( $\text{cm}^{-1}$ ).

# Supplementary Table S1

| <b>Vegetable name</b> | <b>Botanical nomenclature</b>                                    |
|-----------------------|------------------------------------------------------------------|
| Cabbage               | <i>Brassica oleracea L. var. capitata</i>                        |
| Red cabbage           | <i>Brassica oleracea L. var. capitata L. f. rubra (L.) Thell</i> |
| Japanese radish       | <i>Raphanus sativus L</i>                                        |
| Chinese cabbage       | <i>Brassica rapa var. pekinensis</i>                             |
| Broccoli              | <i>Brassica oleracea var. italica</i>                            |
| Watercress            | <i>Nasturtium officinale</i>                                     |
| Kale                  | <i>Brassica oleracea var. acephala</i>                           |
| Onion                 | <i>Allium cepa L.</i>                                            |
| Carrot                | <i>Daucus carota L.</i>                                          |
| Yellow carrot         | <i>Daucus carota L.</i>                                          |
| Purple carrot         | <i>Daucus carota L.</i>                                          |
| Lettuce               | <i>Lactuca sativa L.</i>                                         |
| Pumpkin               | <i>Cucurbita maxima</i>                                          |
| Tomato                | <i>Solanum lycopersicum</i>                                      |
| Egg plant             | <i>Solanum melongena</i>                                         |
| Green bell pepper     | <i>Capsicum annuum var. grossum</i>                              |
| Red bell pepper       | <i>Capsicum annuum var. grossum</i>                              |
| Yellow bell pepper    | <i>Capsicum annuum var. grossum</i>                              |
| Celery                | <i>Apium graveolens var. dulce</i>                               |
| Sweet potato          | <i>Ipomoea batatas L.</i>                                        |
| Beet                  | <i>Beta vulgaris</i>                                             |
| Spinach               | <i>Spinacia oleracea L.</i>                                      |

**Table. S1. The list of vegetable extracts used in this study.**

# Supplementary Data Fig. S1

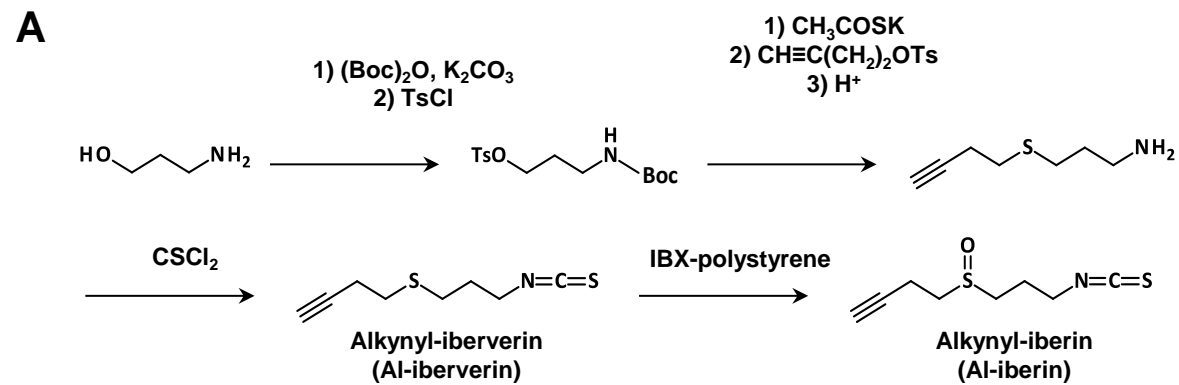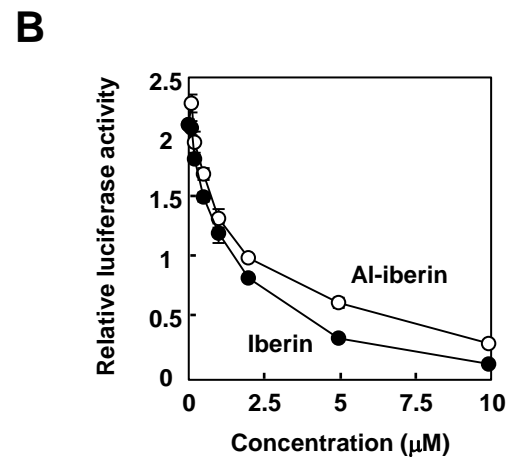

**Fig. S1. Click chemistry for detection of iberin-bound proteins.**

(A) Synthesis of alkynylated iberin analogues (Al-iberin and Al-iberverin).

(B) Effect of iberin and Al-iberin on LPS-induced TLR4 activity in the HEK293-TLR4 cells.

# Supplementary Data Fig. S2

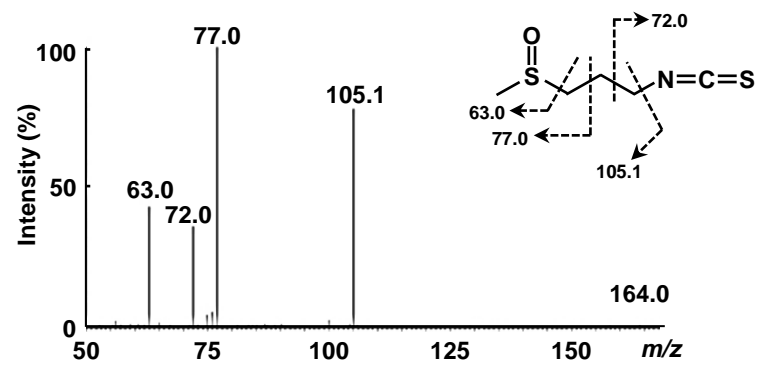

Fig. S2. The MS/MS analysis of iberin isolated from cabbage extract.

# Supplementary Data Fig. S3

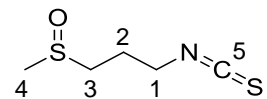

| Position | $\delta_{\text{H}}$ (ppm) | $\delta_{\text{C}}$ (ppm) |
|----------|---------------------------|---------------------------|
| 1        | 3.752-3.736 (2H, m)       | 44.43                     |
| 2        | 2.211 (2H, m)             | 23.91                     |
| 3        | 2.805-2.785 (2H, m)       | 51.33                     |
| 4        | 2.623 (3H, s)             | 38.63-39.29               |
| 5        |                           | 132.48                    |

**Fig. S3. The  $^1\text{H}$ - and  $^{13}\text{C}$  NMR analysis of purified iberin.**

# Supplementary Data Fig. S4

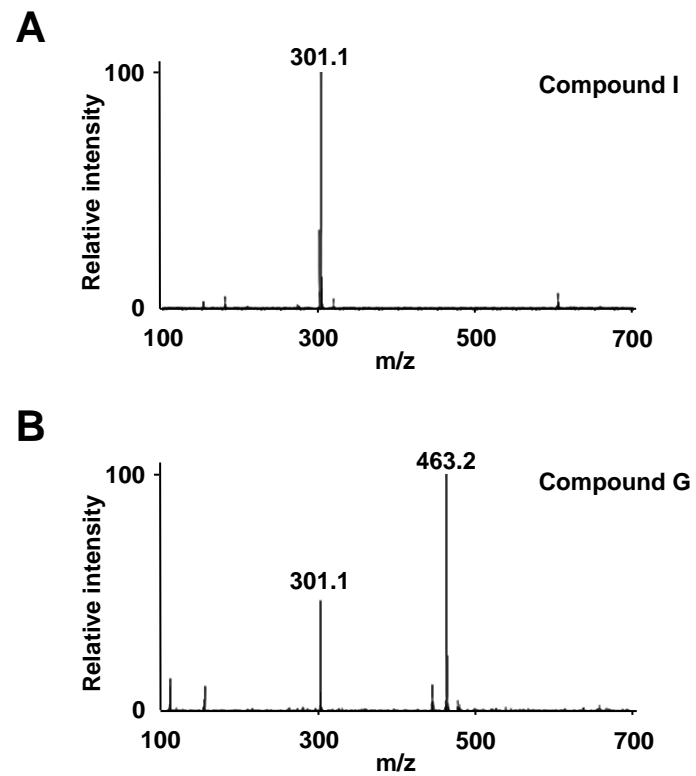

**Fig. S4. The mass spectra of compounds G and I.**

Compounds I (A) and G (B) were analyzed by UPLC-ESI-MS in the negative ion mode.

# Supplementary Data Fig. S5

**A**

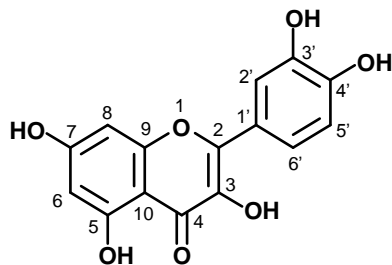

**Quercetin  
(QUE)**

| Position | $\delta_{\text{H}}$ (ppm) | $\delta_{\text{C}}$ (ppm) |
|----------|---------------------------|---------------------------|
| 1        |                           |                           |
| 2        |                           | 148.00                    |
| 3        |                           | 137.21                    |
| 4        |                           | 177.33                    |
| 5        |                           | 162.50                    |
| 6        | 6.27                      | 99.25                     |
| 7        |                           | 165.34                    |
| 8        | 6.47                      | 94.40                     |
| 9        |                           | 158.22                    |
| 10       |                           | 104.52                    |
| 1'       |                           | 124.15                    |
| 2'       | 7.82                      | 115.99                    |
| 3'       |                           | 148.75                    |
| 4'       |                           | 146.21                    |
| 5'       | 6.97                      | 116.22                    |
| 6'       | 7.72                      | 121.67                    |

**B**

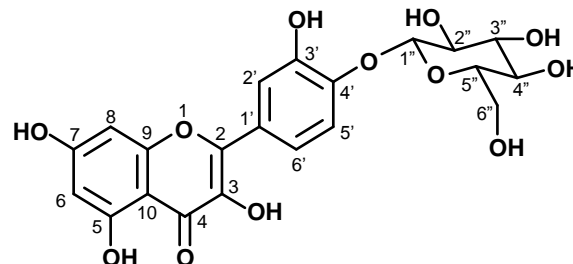

**Quercetin-4'-O- $\beta$ -glucoside  
(Q4'G)**

| Position | $\delta_{\text{H}}$ (ppm) | $\delta_{\text{C}}$ (ppm) |
|----------|---------------------------|---------------------------|
| 1        |                           |                           |
| 2        |                           | 148.04                    |
| 3        |                           | 137.89                    |
| 4        |                           | 177.36                    |
| 5        |                           | 162.47                    |
| 6        | 6.25                      | 99.31                     |
| 7        |                           | 165.66                    |
| 8        | 6.44                      | 94.47                     |
| 9        |                           | 158.19                    |
| 10       |                           | 104.54                    |
| 1'       |                           | 127.6                     |
| 2'       | 7.81                      | 116.49                    |
| 3'       |                           | 147.83                    |
| 4'       |                           | 146.79                    |
| 5'       | 7.35                      | 117.62                    |
| 6'       | 7.75                      | 121.26                    |
| 1''      | 5                         | 103.42                    |
| 2''      | 3.61                      | 74.82                     |
| 3''      | 3.6                       | 77.54                     |
| 4''      | 3.53                      | 71.32                     |
| 5''      | 3.57                      | 78.36                     |
| 6''      | 4.02<br>3.85              | 62.44                     |

**Fig. S5. The  $^1\text{H}$ - and  $^{13}\text{C}$  NMR analysis of compound I (A) and G (B)**



# Supplementary Data Fig. S6

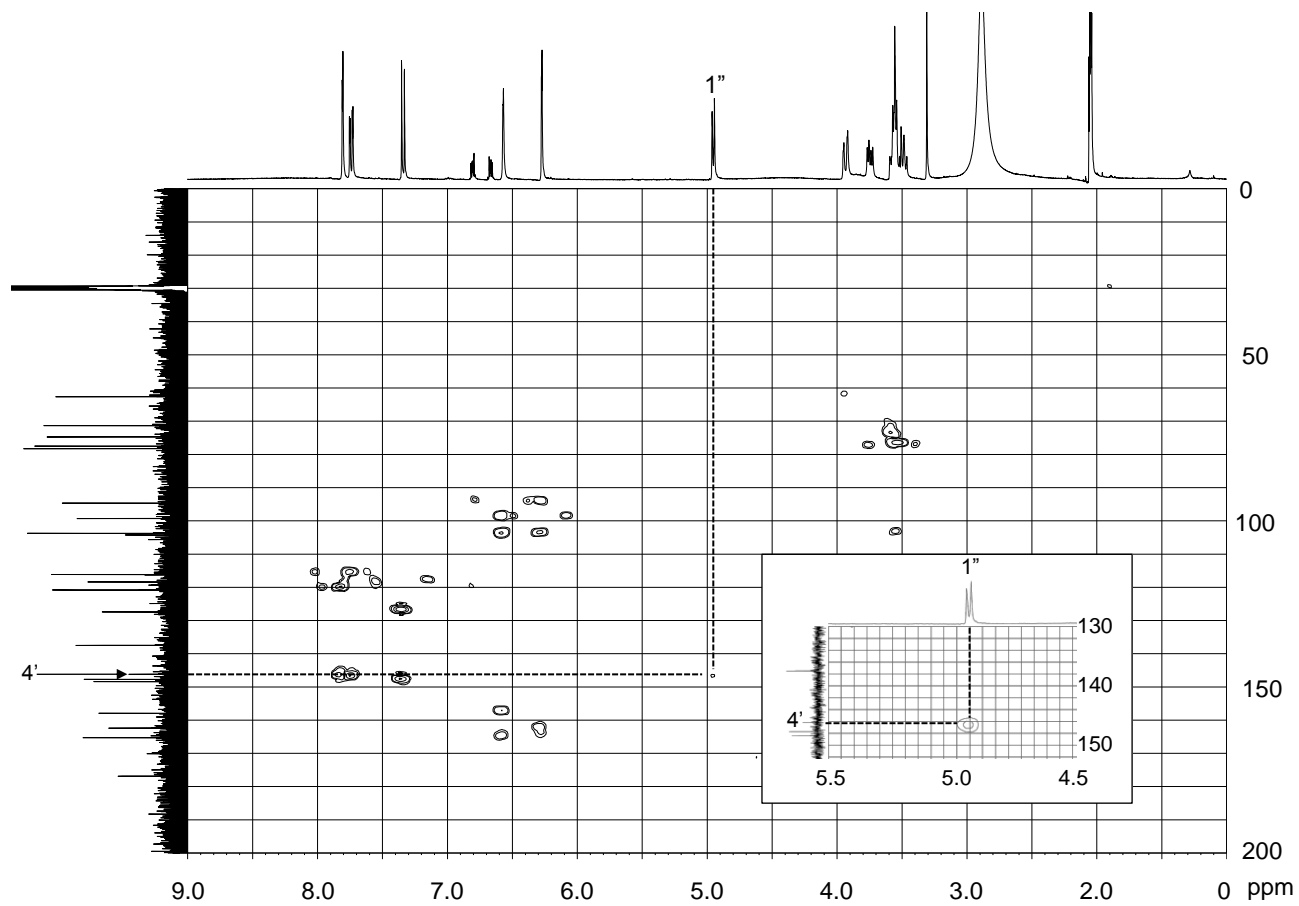

**Fig. S6.** The HMBC spectrum of compound G.
